# Supplementary material for: Morphology of the Kosi megafan channels
Source: Copernicus journal article supplement (doi:10.5194/esurf-3-321-2015), 2015-07-21
Supplement: Supplementary file 1 [file esurf-3-321-2015-supplement.zip]

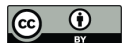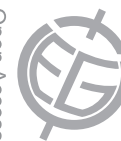

## *Supplement of*

# **Morphology of the Kosi megafan channels**

**K. Gaurav et al.**

*Correspondence to:* K. Gaurav (gaurav@ipgp.fr)

- esurf-3-321-2015-supplement-title-page.pdf
- Measurements\_location.kmz

The copyright of individual parts of the supplement might differ from the CC-BY 3.0 licence.
